# Supplementary material for: DNA nanolantern-based split aptamer probes for in situ ATP imaging in living cells and lighting up mitochondria
Source: Royal Society of Chemistry journal article supplement (doi:10.1039/d1an00275a), 2021-01-01
Supplement: d1an00275a1.pdf [file d1an00275a1.pdf]

## Supporting information for

### **DNA nanolanthern-based split aptamer probes for *in-situ* ATP imaging in living cells and lighting up mitochondria**

Ya-Xin Wang, Dong-Xia Wang, Jia-Yi Ma, Jing Wang, Yi-Chen Du, De-Ming Kong\*

*State Key Laboratory of Medicinal Chemical Biology, Tianjin Key Laboratory of Biosensing and Molecular Recognition, Research Centre for Analytical Sciences, College of Chemistry, Nankai University, Tianjin, 300071, PR China*

\*Email: kongdem@nankai.edu.cn

## **1. Reagents and instruments**

### *Materials and reagents.*

All DNA oligonucleotides (Table S1) were purchased from Sangon Biotech Co., Ltd. (Shanghai, China) and purified by ultra-PAGE (polyacrylamide gel electrophoresis) and high-performance liquid chromatography methods. ATP was purchased from Sigma-Aldrich Chemical Co. Ltd. UTP, GTP, CTP were obtained from NEW ENGLAND BioLabs® Inc. Mito-Tracker Green was purchased from Yeasen Biotech Co., Ltd (Shanghai, China). Cell Counting Kit-8 was obtained from Beyotime Biotech Co., Ltd. (Shanghai, China). Camptothecin and oligomycin was purchased from Yuanye Biotech Co., Ltd. (Shanghai, China). Deionized and sterilized water (resistance > 18.25 MΩ·cm) was used in all experiments. All chemical reagents were of analytical grade and without any further purification before use.

### *Instruments*

All the fluorescence measurements were conducted on a Shimadzu RF-5301 PC fluorescence spectrometer (Shimadzu Ltd., Japan) with an excitation wavelength of 540 nm. Excitation and emission slits were set at 5.0 and 3.0 nm, respectively. Dynamic light scattering (DLS) experiments were performed on the Malvern Zetasizer Nano ZS90 (Malvern Instruments, Ltd., Worcestershire, UK) at room temperature. Atomic force microscopy (AFM) characterization was carried out using Bruker Dimension Icon (USA). The cell fluorescence images were captured by confocal laser scanning microscope (Nikon A1R) equipped with 60 × objective lens

and 100 × objective lens. The cytotoxicity assay was performed via microplate reader (Synergy 4).

**Table S1. Oligonucleotides used in this work**

| Oligonucleotide | Sequence (5'→3')                                                         |
|-----------------|--------------------------------------------------------------------------|
| A1              | ATT GTG ACC CAC CAG TAT GAC CCG TTC GGA                                  |
| A2              | TCC GAA CGG GTC ATA GTG TCA CTC TTG ACA TCC                              |
| A3-apt1         | <u>Cy3-ACCTGGGGGAGTAT</u> GGA TGT CAA GAG TGA GTG GTC<br>ACG ACG TCA TTA |
| A3-apt2         | <u>TGCGGAGGAAGGT(Cy5)</u> GGA TGT CAA GAG TGA GTG GTC<br>ACG ACG TCA TTA |
| A4              | TAA TGA CGT CGT GAC GTG CTG GTG GGT CAC AAT                              |
| apt1            | Cy3-ACCTGGGGGAGTAT                                                       |
| apt2            | TGCGGAGGAAGGT-Cy5                                                        |

NLa-1 is constructed by A1 + A2 + A3-apt1 + A4.

NLa-2 is constructed by A1 + A2 + A3-apt2 + A4.

Underline is the split ATP aptamer sequence.

## 2. Fluorescence spectra NLa-1, NLa-2 and their mixture

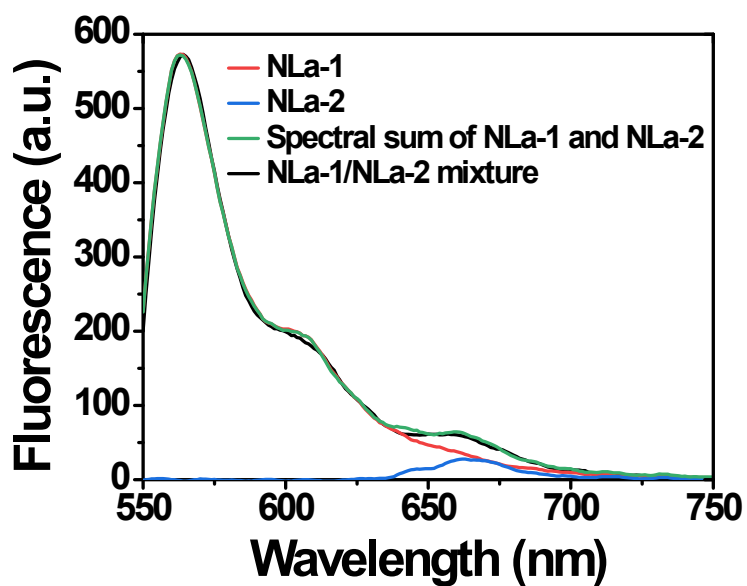

**Figure S1.** Fluorescence spectra of NLa-1, NLa-2, NLa-1/NLa-2 mixture and the spectral sum of NLa-1 and NLa-2.

## 3. ATP-sensing using single-stranded split aptamer probes (apt1/apt2)

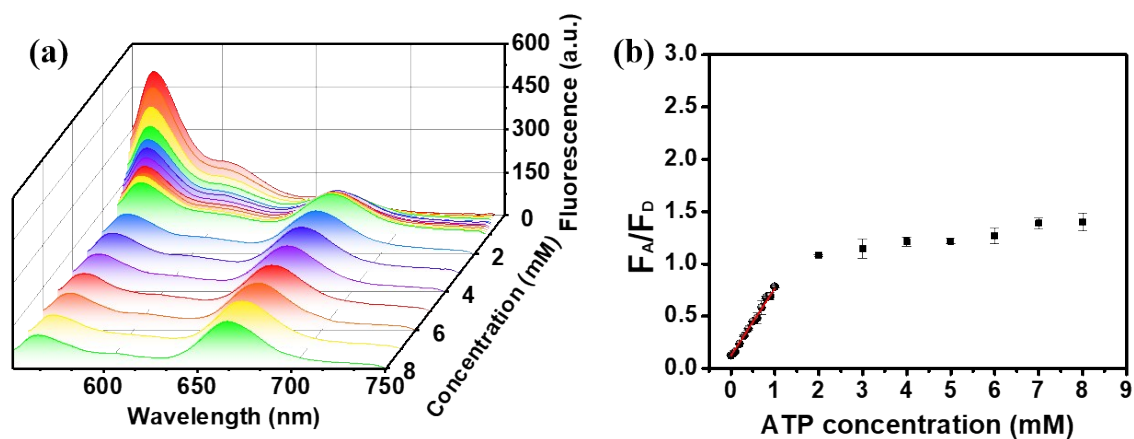

**Figure S2.** ATP-sensing using apt1/apt2 mixture. (a) Fluorescence spectral change of the apt1/apt2 mixture in response to different concentrations of ATP. (b) ATP concentration-dependent  $F_A/F_D$  ratio change. The red line represents the linear relationship between  $F_A/F_D$  ratio and ATP concentration in the range of 0 – 1 mM.

#### 4. Incubation time-dependent ATP-imaging

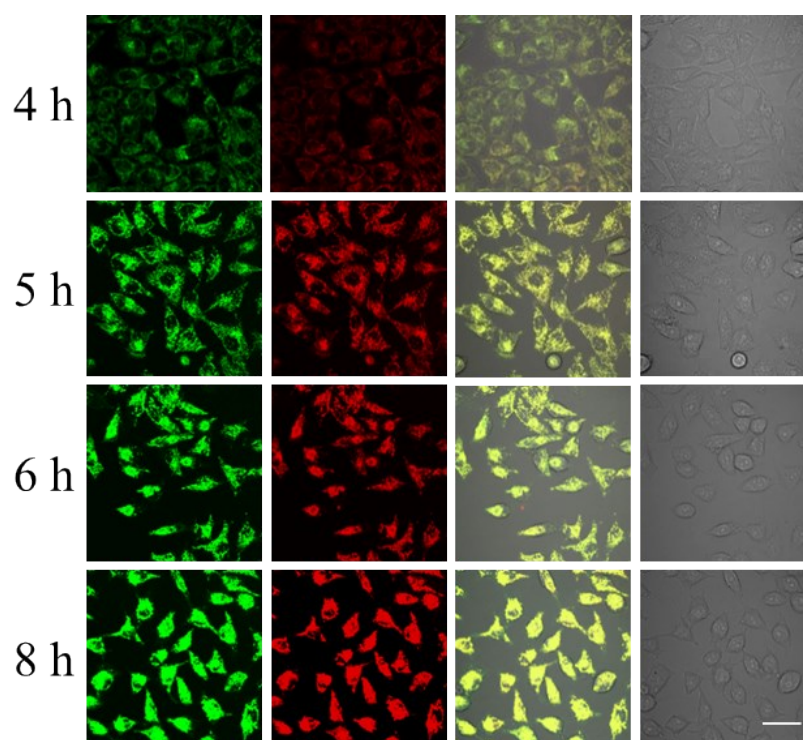

**Figure S3.** Fluorescence images of MCF-7 cells incubated with NLa-1/NLa-2 mixture for different time. Scale bar is 50  $\mu\text{m}$ .

#### 5. Cytotoxicity of nanoprobe towards HEK-293 cells

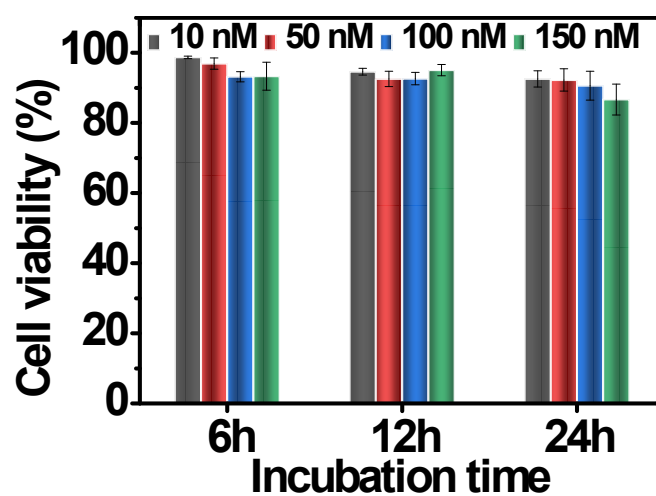

**Figure S4.** Cell viability of HEK-293 cells after incubation with different concentrations of NLa-1/NLa-2 mixture for different time.

6. Colocalization analysis between Mito-Tracker and Cy5

**Table S2** Colocalization analysis parameters of the cell image in Figure 6

|                                         |           |
|-----------------------------------------|-----------|
| <b>Pearson's correlation</b>            | 0. 870249 |
| <b>Mander's overlap</b>                 | 0. 916618 |
| <b>Mander's overlap coefficients k1</b> | 0. 493518 |
| <b>Mander's overlap coefficients k2</b> | 1. 702448 |

7. Colocalization analysis between Mito-Tracker and Cy3

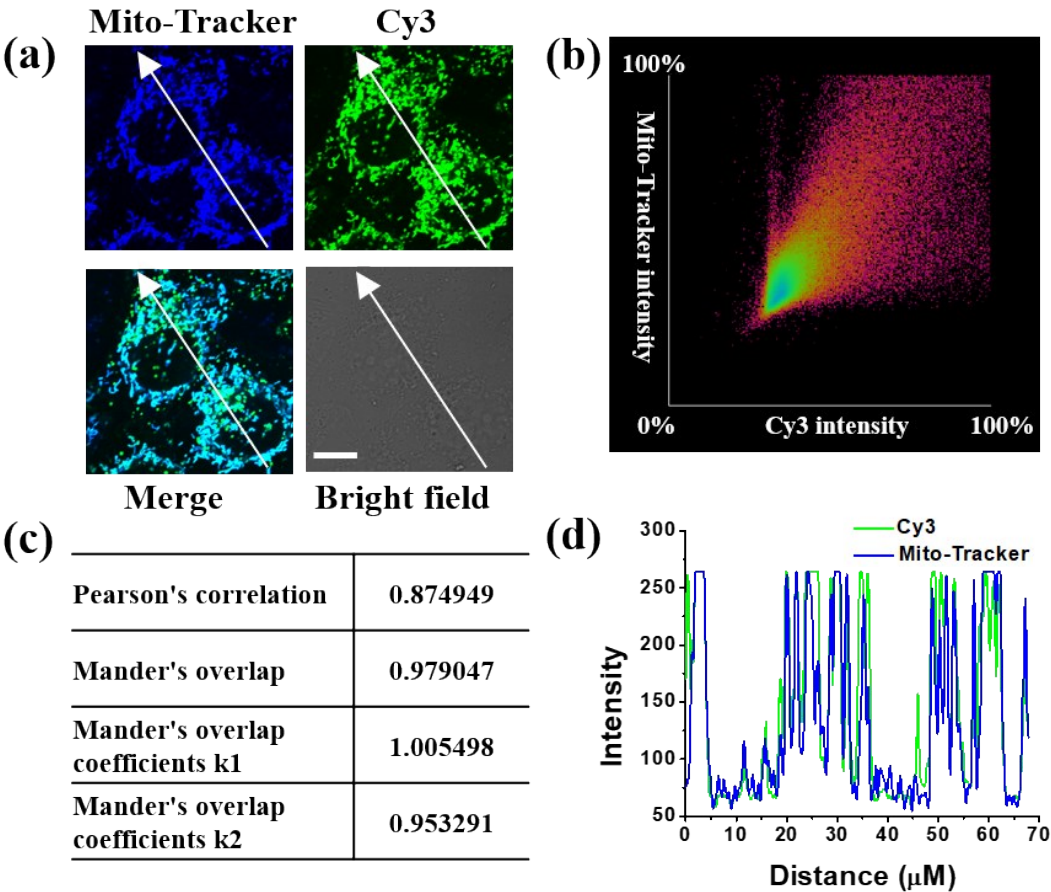

**Figure S5.** Intracellular colocalization image of Cy3 and Mito-Tracker Green fluorescence in MCF-7 cells. (a) Fluorescence images collected from Mito-Tracker Green and Cy3 channels and merged image. (b) Intensity scatter plot of Cy3 and Mito-Tracker Green. (c) Colocalization analysis parameters of the cell image. (d) Fluorescence intensity profile of the white arrow in (a). Scale bar is 20 μm.

## 8. Colocalization analysis between Cy3 and Cy5

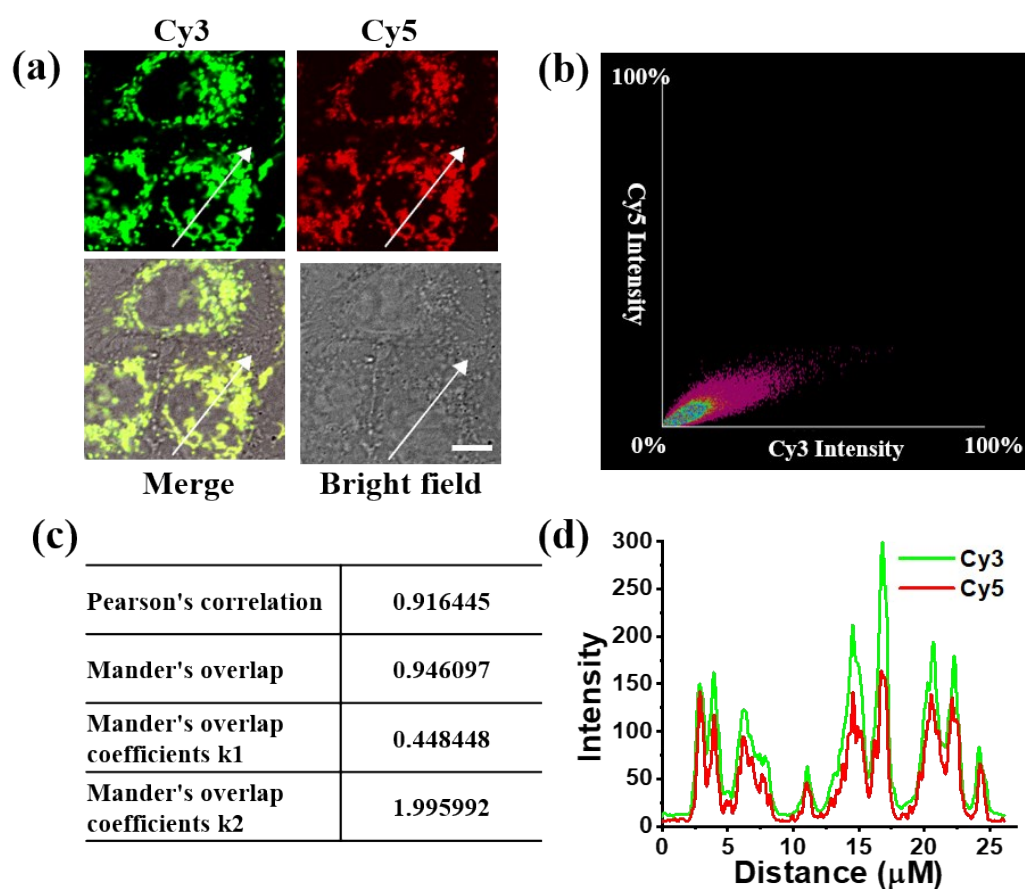

**Figure S6.** Intracellular colocalization image of Cy3 and Cy5 fluorescence in MCF-7 cells. (a) Fluorescence images collected from Cy3 and Cy5 channels and merged image. (b) Intensity scatter plot of Cy3 and Cy5. (c) Colocalization analysis parameters of the cell image. (d) Fluorescence intensity profile of the white arrow in (a). Scale bar is 20  $\mu\text{m}$ .

## 9. Comparison of different methods for ATP sensing

| Method                                                | Sample                     | Detection range  | Pros                                                                                                                                 | Cons                                                                                          | Ref.      |
|-------------------------------------------------------|----------------------------|------------------|--------------------------------------------------------------------------------------------------------------------------------------|-----------------------------------------------------------------------------------------------|-----------|
| Graphene Oxide-Aptamer Beacon                         | Cytoplasm                  | 0.125-2 mM       | Stability                                                                                                                            | Extra synthesis and modification                                                              | 1         |
| Conjugated polymer                                    | Solution                   | 25-180 $\mu$ M   | Sensitivity, distinguish from UTP, GTP, ADP, AMP)                                                                                    | Require organic synthesis, time-consuming not suitable for intracellular analysis             | 2         |
| Carbon Dots                                           | Lysosome                   | 0.01-5 mM        | Real-time monitoring; locate in lysosome                                                                                             | Require organic synthesis, cytotoxicity                                                       | 3         |
| Organic fluorescent probes (Rh6G-ACFPN)               | Mitochondria               | 2-10 mM          | Reversible detection; quantification analysis                                                                                        | Require organic synthesis, time-consuming, cytotoxicity                                       | 4         |
| Upconversion Luminescence-Activated DNA Nanodevice    | HeLa tumor-bearing mice    | 1-10 mM          | Living body ATP-analysis                                                                                                             | Complex synthesis and modification, cytotoxicity                                              | 5         |
| DNA Nanomachine                                       | Lymphatic metastasis model | 0.05-1 mM        | Living body ATP-analysis                                                                                                             | Complex synthesis and modification                                                            | 6         |
| AgNC-based ratiometric fluorescent nanosensor         | Mouse cerebrospinal fluid  | 0.005-90 $\mu$ M | Determination of ATP in the mouse cerebrospinal fluid with high accuracy                                                             | Not suitable for intracellular analysis                                                       | 7         |
| G-rich split aptamer-ThT based fluorescent ATP sensor | Human serum samples        | 50 nM-12 mM      | High specificity (distinguish from UTP, GTP, ADP, AMP)                                                                               | Not suitable for intracellular analysis                                                       | 8         |
| HCR-Amplified ATP Aptasensor                          | Cytoplasm                  | 1-10 $\mu$ M     | Sensitivity                                                                                                                          | Transfection step/ cytotoxicity                                                               | 9         |
| Photo-cleavable aptamer                               | Mitochondria               | 0.05-5 mM        | Sensitivity, locate in mitochondria                                                                                                  | Transfection step/ cytotoxicity                                                               | 10        |
| ATP nanoflares                                        | Cytoplasm                  | 0.05-5 mM        | Monitoring during the hyperthermia cell death process                                                                                | Complex synthesis and modification, cytotoxicity                                              | 11        |
| DNA Nanoprism                                         | Cytoplasm                  | 0.03 – 2 mM      | Simple, high cell permeability and stability, low background                                                                         | Carry a limited number of aptamers, cannot be used for quantitative detection of cellular ATP | 12        |
| DNA nanolatern-based split aptamer nanoprobe          | Mitochondria               | 0.025-7 mM       | Simple, high cell permeability and stability, low background, wide detection range/ high density of aptamers, locate in mitochondria | Cannot be used for quantitative detection of cellular ATP                                     | this work |



## 10. References

1. Y. Zhang, G. Qi, B. Wang, D. Wang and Y. Jin, *Anal. Chem.*, 2014, **86**, 12229-12235.
2. Q. Zhao, Z. Zhang and Y. Tang, *Chem. Comm.*, 2017, **53**, 9414-9417.
3. X. Geng, Y. Sun, Y. Guo, Y. Zhao, K. Zhang, L. Xiao, L. Qu and Z. Li, *Anal. Chem.*, 2020, **92**, 7940-7946.
4. T. B. Ren, S. Y. Wen, L. Wang, P. Lu, B. Xiong, L. Yuan and X. B. Zhang, *Anal. Chem.*, 2020, **92**, 4681-4688.
5. J. Zhao, J. Gao, W. Xue, Z. Di, H. Xing, Y. Lu and L. Li, *J. A. Chem. Soc.*, 2018, **140**, 578-581.
6. Z. Di, J. Zhao, H. Chu, W. Xue, Y. Zhao and L. Li, *Adv. Mater.*, 2019, **31**, e1901885.
7. Z. Liu, P. Wu, Y. Yin and Y. Tian, *Chem. Comm.*, 2019, **55**, 9955-9958.
8. Y. Ma, F. Geng, Y. Wang, M. Xu, C. Shao, P. Qu, Y. Zhang and B. Ye, *Biosens. Bioelectron.*, 2019, **134**, 36-41.
9. Y. Zhou, L. Yang, J. Wei, K. Ma, X. Gong, J. Shang, S. Yu and F. Wang, *Anal. Chem.*, 2019, **91**, 15229-15234.
10. S. Hong, X. Zhang, R. J. Lake, G. T. Pawel, Z. Guo, R. Pei and Y. Lu, *Chem. Sci.*, 2020, **11**, 713-720.
11. Y. Zhang, G. Qi, B. Wang, D. Wang and Y. Jin, *Anal. Chem.*, 2020, **92**, 3882-3887.
12. X. Zheng, R. Peng, X. Jiang, Y. Wang, S. Xu, G. Ke, T. Fu, Q. Liu, S. Huan and X. Zhang, *Anal. Chem.*, 2017, **89**, 10941-10947.
